# Supplementary material for: Structural basis for Sfm1 functioning as a protein arginine methyltransferase
Source: PubMed Central journal article supplement (PMC4860837; doi:10.1038/celldisc.2015.37), 2015-12-29
Supplement: celldisc201537-s7.pdf [file celldisc201537-s7.pdf]

**Table S1. Structural similarity of Sfm1 with representative SPOUT MTases**

| <b>Protein</b> | <b>PDB ID</b> | <b>Z score</b> | <b>Rmsd (Å)</b> | <b>Nali</b> | <b>Nres</b> | <b>Identity (%)</b> |
|----------------|---------------|----------------|-----------------|-------------|-------------|---------------------|
| Trm10          | 4JWF          | 10.2           | 3.1             | 137         | 188         | 9                   |
| TrmL           | 4JAL          | 9.6            | 2.8             | 120         | 156         | 17                  |
| Nep1           | 3OIJ          | 6.1            | 3.2             | 117         | 212         | 12                  |
| TrmD           | 4MCD          | 4.9            | 6.8             | 104         | 237         | 13                  |
