# Supplementary material for: Structural basis for Sfm1 functioning as a protein arginine methyltransferase
Source: PubMed Central journal article supplement (PMC4860837; doi:10.1038/celldisc.2015.37), 2015-12-29
Supplement: celldisc201537-s8.pdf [file celldisc201537-s8.pdf]

**Table S2. Identification of interacting partners of yeast ribosomal protein S3**

| <b>Top hits (&gt;4 identical peptides)</b> | <b>UniProt#</b> | <b>Mol Wt (Da)</b> | <b>No. identical peptides</b> |
|--------------------------------------------|-----------------|--------------------|-------------------------------|
| S3                                         | P05750          | 26503              | 11                            |
| Yar1                                       | P46683          | 22356              | 8                             |
| GAPDH-3                                    | P00359          | 35747              | 8                             |
| SSA1                                       | P10591          | 69657              | 6                             |
| Sfm1                                       | Q12314          | 24743              | 4                             |
