# Supplementary material for: Structural basis for Sfm1 functioning as a protein arginine methyltransferase
Source: Cell Discov. 2015 Dec 29;1:15037–. doi: 10.1038/celldisc.2015.37 (PMC4860837; doi:10.1038/celldisc.2015.37)
Supplement: Supplementary Information [file celldisc201537-s9.pdf]

## 1    **Supplementary Materials**

2    **Supplementary Figure S1** Structure of Sfm1. **(a)** Secondary structure topology  
3    of Sfm1.  $\alpha$ -helices are shown as circles and  $\beta$ -strands as triangles. **(b)** Sequence  
4    alignment of Sfm1 with these in other fungi species. The sequences used in the  
5    alignment are: *Saccharomyces cerevisiae* (Sfm1, NCBI accession: NP\_014664.1),  
6    *Ashbya gossypii* (NCBI accession: NP\_982651.1), *Neurospora crassa* (NCBI  
7    accession: XP\_960963.1), *Kluyveromyces lactis* (NCBI accession:  
8    XP\_454372.1), *Magnaporthe oryzae* (NCBI accession: XP\_368470.1) and  
9    *Plasmodium falciparum* (NCBI accession: XP\_001350056.1). The alignment is  
10    performed using ClustalX [1] and displayed using ESPript [2]. The secondary  
11    structure elements of Sfm1 are placed on the top of the alignment. Strictly  
12    conserved residues are highlighted in shaded red boxes and conserved residues in  
13    open red boxes. The L1, L2 and L3 loops are highlighted by dotted boxes. The  
14    two Glu residues and the Trp residue at the active site are indicated by black and  
15    red asterisks, respectively, and the acidic residues of the CTD composing the  
16    potential substrate-binding site are indicated by magenta asterisks. **(c)**  
17    Superposition of the apo and SAH-bound Sfm1 structures. The structures of both  
18    apo and SAH-bound Sfm1 are shown with ribbon models and SAH is shown  
19    with a stick model. The SPOUT domain and the CTD of the apo and SAH-bound  
20    Sfm1 structures are colored in cyan, magenta, slate and green, respectively. The  
21    two structures can be superimposed very well with an RMSD of 1.2 Å for 200

22 C $\alpha$  atoms. Structure elements with notable conformational changes upon SAH  
23 binding are indicated in red.

24 **Supplementary Figure S2** Sfm1 exists as a monomer in the crystal structure. (a)  
25 Structure of dimeric TrmL (PDB ID: 4JAL) with the “perpendicular” manner.  
26 Monomers A and B are colored in yellow and blue-white, respectively. Two  
27 helices ( $\alpha$ 1 and  $\alpha$ 6) at the dimer interface are colored in green and blue,  
28 respectively. (b) Structure of dimeric TrmD (PDB ID: 4MCD) with the  
29 “antiparallel” manner. Monomers A and B are colored in salmon and grey,  
30 respectively. Two helices ( $\alpha$ 1 and  $\alpha$ 6) at the dimer interface are colored in slate  
31 and orange, respectively. (c) Superposition of Sfm1 and dimeric TrmL structures.  
32 (d) Superposition of Sfm1 and dimeric TrmD structures. The SPOUT domain of  
33 Sfm1 can be superimposed onto that of TrmL with an RMSD of 2.8 Å for 120  
34 C $\alpha$  atoms, and that of TrmD with an RMSD of 6.8 Å for 104 C $\alpha$  atoms. All the  
35 structures are shown with ribbon models and SAH (or its analog) with stick  
36 models.

37 **Supplementary Figure S3** Comparison of the intermolecular interface in the  
38 apo and SAH-bound Sfm1 structures. (a) The intermolecular interface of two  
39 molecules in the ASU in the apo Sfm1 structure. (b) The intermolecular interface  
40 of two molecules in the ASU in the SAH-bound Sfm1 structure. Sfm1 is shown  
41 with a ribbon model and SAH with stick a model. The SPOUT domain and the  
42 CTD of the apo and SAH-bound Sfm1 are colored in cyan, magenta, slate and  
43 green, respectively, and the other molecules are colored in wheat and grey,

44 respectively. **(c)** Comparison of the apo and SAH-bound Sfm1 structures based  
45 on superposition of one Sfm1 molecule.

46 **Supplementary Figure S4** Sfm1 exists and functions as a monomer in solution.

47 **(a)** Size-exclusion chromatography analyses of Sfm1 with different fusion tag  
48 locations and the C-terminal truncations, and in the presence or absence of SAH.  
49 Sfm1: residues 1-213; Sfm1 $\Delta$ C: residues 1-204 and Sfm1 $\Delta$ CTD: residues 1-154.  
50 The molecular weight markers are indicated. **(b)** Dynamic light scattering  
51 analysis of the C-terminal his<sub>6</sub> tagged Sfm1 in the absence of SAH. **(c)** Dynamic  
52 light scattering analysis of the C-terminal his<sub>6</sub> tagged Sfm1 in the presence of  
53 SAH. **(d)** *In vitro* PRMT activity of Sfm1 with or without the C-terminal  
54 truncation and with different fusion tags and tag locations towards human S3  
55 Sfm1. Error bars are the SD from at least three replicates.

56 **Supplementary Figure S5** Sequence comparison of S3 from different species.

57 **(a)** A schematic representation of human S3. Arrows indicate locations of Arg64,  
58 Arg65, Arg67 and Arg146. **(b)** Sequence alignment of S3 in different organisms.  
59 The sequences used in the alignment are: *Saccharomyces cerevisiae* (NCBI  
60 accession: NP\_014221.3), *Homo sapiens* (NCBI accession: NP\_000996.2), *Mus*  
61 *musculus* (NCBI accession: NP\_036182.1), *Rattus norvegicus* (NCBI accession:  
62 NP\_001009239.1), *Macaca mulatta* (NCBI accession: XP\_001086020.1), *Bos*  
63 *taurus* (NCBI accession: NP\_001029219.1), *Canis lupus* (NCBI accession:  
64 XP\_534008.1), *Gallus gallus* (NCBI accession: NP\_001026007.1), *Danio rerio*  
65 (NCBI accession: NP\_957447.1), *Drosophila melanogaster* (NCBI accession:

66 NP\_476632.1), *Anopheles gambiae* (NCBI accession: XP\_321155.3),  
67 *Caenorhabditis elegans* (NCBI accession: NP\_498349.1), *Arabidopsis thaliana*  
68 (NCBI accession: NP\_198403.1), *Magnaporthe oryzae* (NCBI accession:  
69 XP\_360299.2), *Kluyveromyces lactis* (NCBI accession: XP\_453432.1), *Ashbya*  
70 *gossypii* (NCBI accession: NP\_982809.1), *Schizosaccharomyces pombe* (NCBI  
71 accession: NP\_596763.1) and *Neurospora crassa* (NCBI accession:  
72 XP\_956174.2). The alignment is performed using ClustalX [1] and displayed  
73 using ESPript [2]. The secondary structure elements of *S. cerevisiae* S3 are  
74 placed on the top of the alignment. Strictly conserved residues are highlighted in  
75 shaded red boxes and conserved residues in open red boxes. Locations of Arg64,  
76 Arg65, Asn67 and Arg146 in *S. cerevisiae* S3 are indicated by asterisks.

77 **Supplementary Figure S6** Sfm1 and human S3 can form a complex and Arg146  
78 of human S3 could be methylated by PRMT1 and PRMT5 *in vitro*. **(a)**  
79 Size-exclusion chromatography analysis of the mixture of Sfm1 (with a  
80 C-terminal 6xHis tag) and human S3 (without any tag). The elution profiles of  
81 Sfm1, human S3 and the Sfm1-S3 complex are shown in magenta, blue and red,  
82 respectively. **(b)** SDS-PAGE analysis of the elute sample collected at the peak of  
83 the size-exclusion chromatography profile of the Sfm1-S3 complex. The gel was  
84 stained by Coomassie blue. **(c)** *In vitro* GST pull-down assays of GST-fused  
85 Sfm1 and Sfm1 $\Delta$ CTD with human His<sub>6</sub>-S3. **(d)** *In vitro* PRMT activity of  
86 PRMT1, PRMT5 and Sfm1 towards human wild-type (WT) S3, mutants (3RA  
87 and R146A) S3 and histone. Error bars are the SD from at least three replicates.

88     **References**

- 89     1 Larkin MA, Blackshields G, Brown NP *et al.* Clustal W and Clustal X version 2.0. *Bioinformatics*  
90     2007; **23**: 2947-2948.
- 91     2 Robert X, Gouet P. Deciphering key features in protein structures with the new ENDscript server.  
92     *Nucleic Acids Res* 2014; **42**: W320-324.

93
